# Supplementary material for: Evidence of peripheral olfactory impairment in the domestic silkworms: insight from the comparative transcriptome and population genetics
Source: PubMed Central journal article supplement (PMC6211594; doi:10.1186/s12864-018-5172-1), 2018-11-01

# KEGG pathway annotation

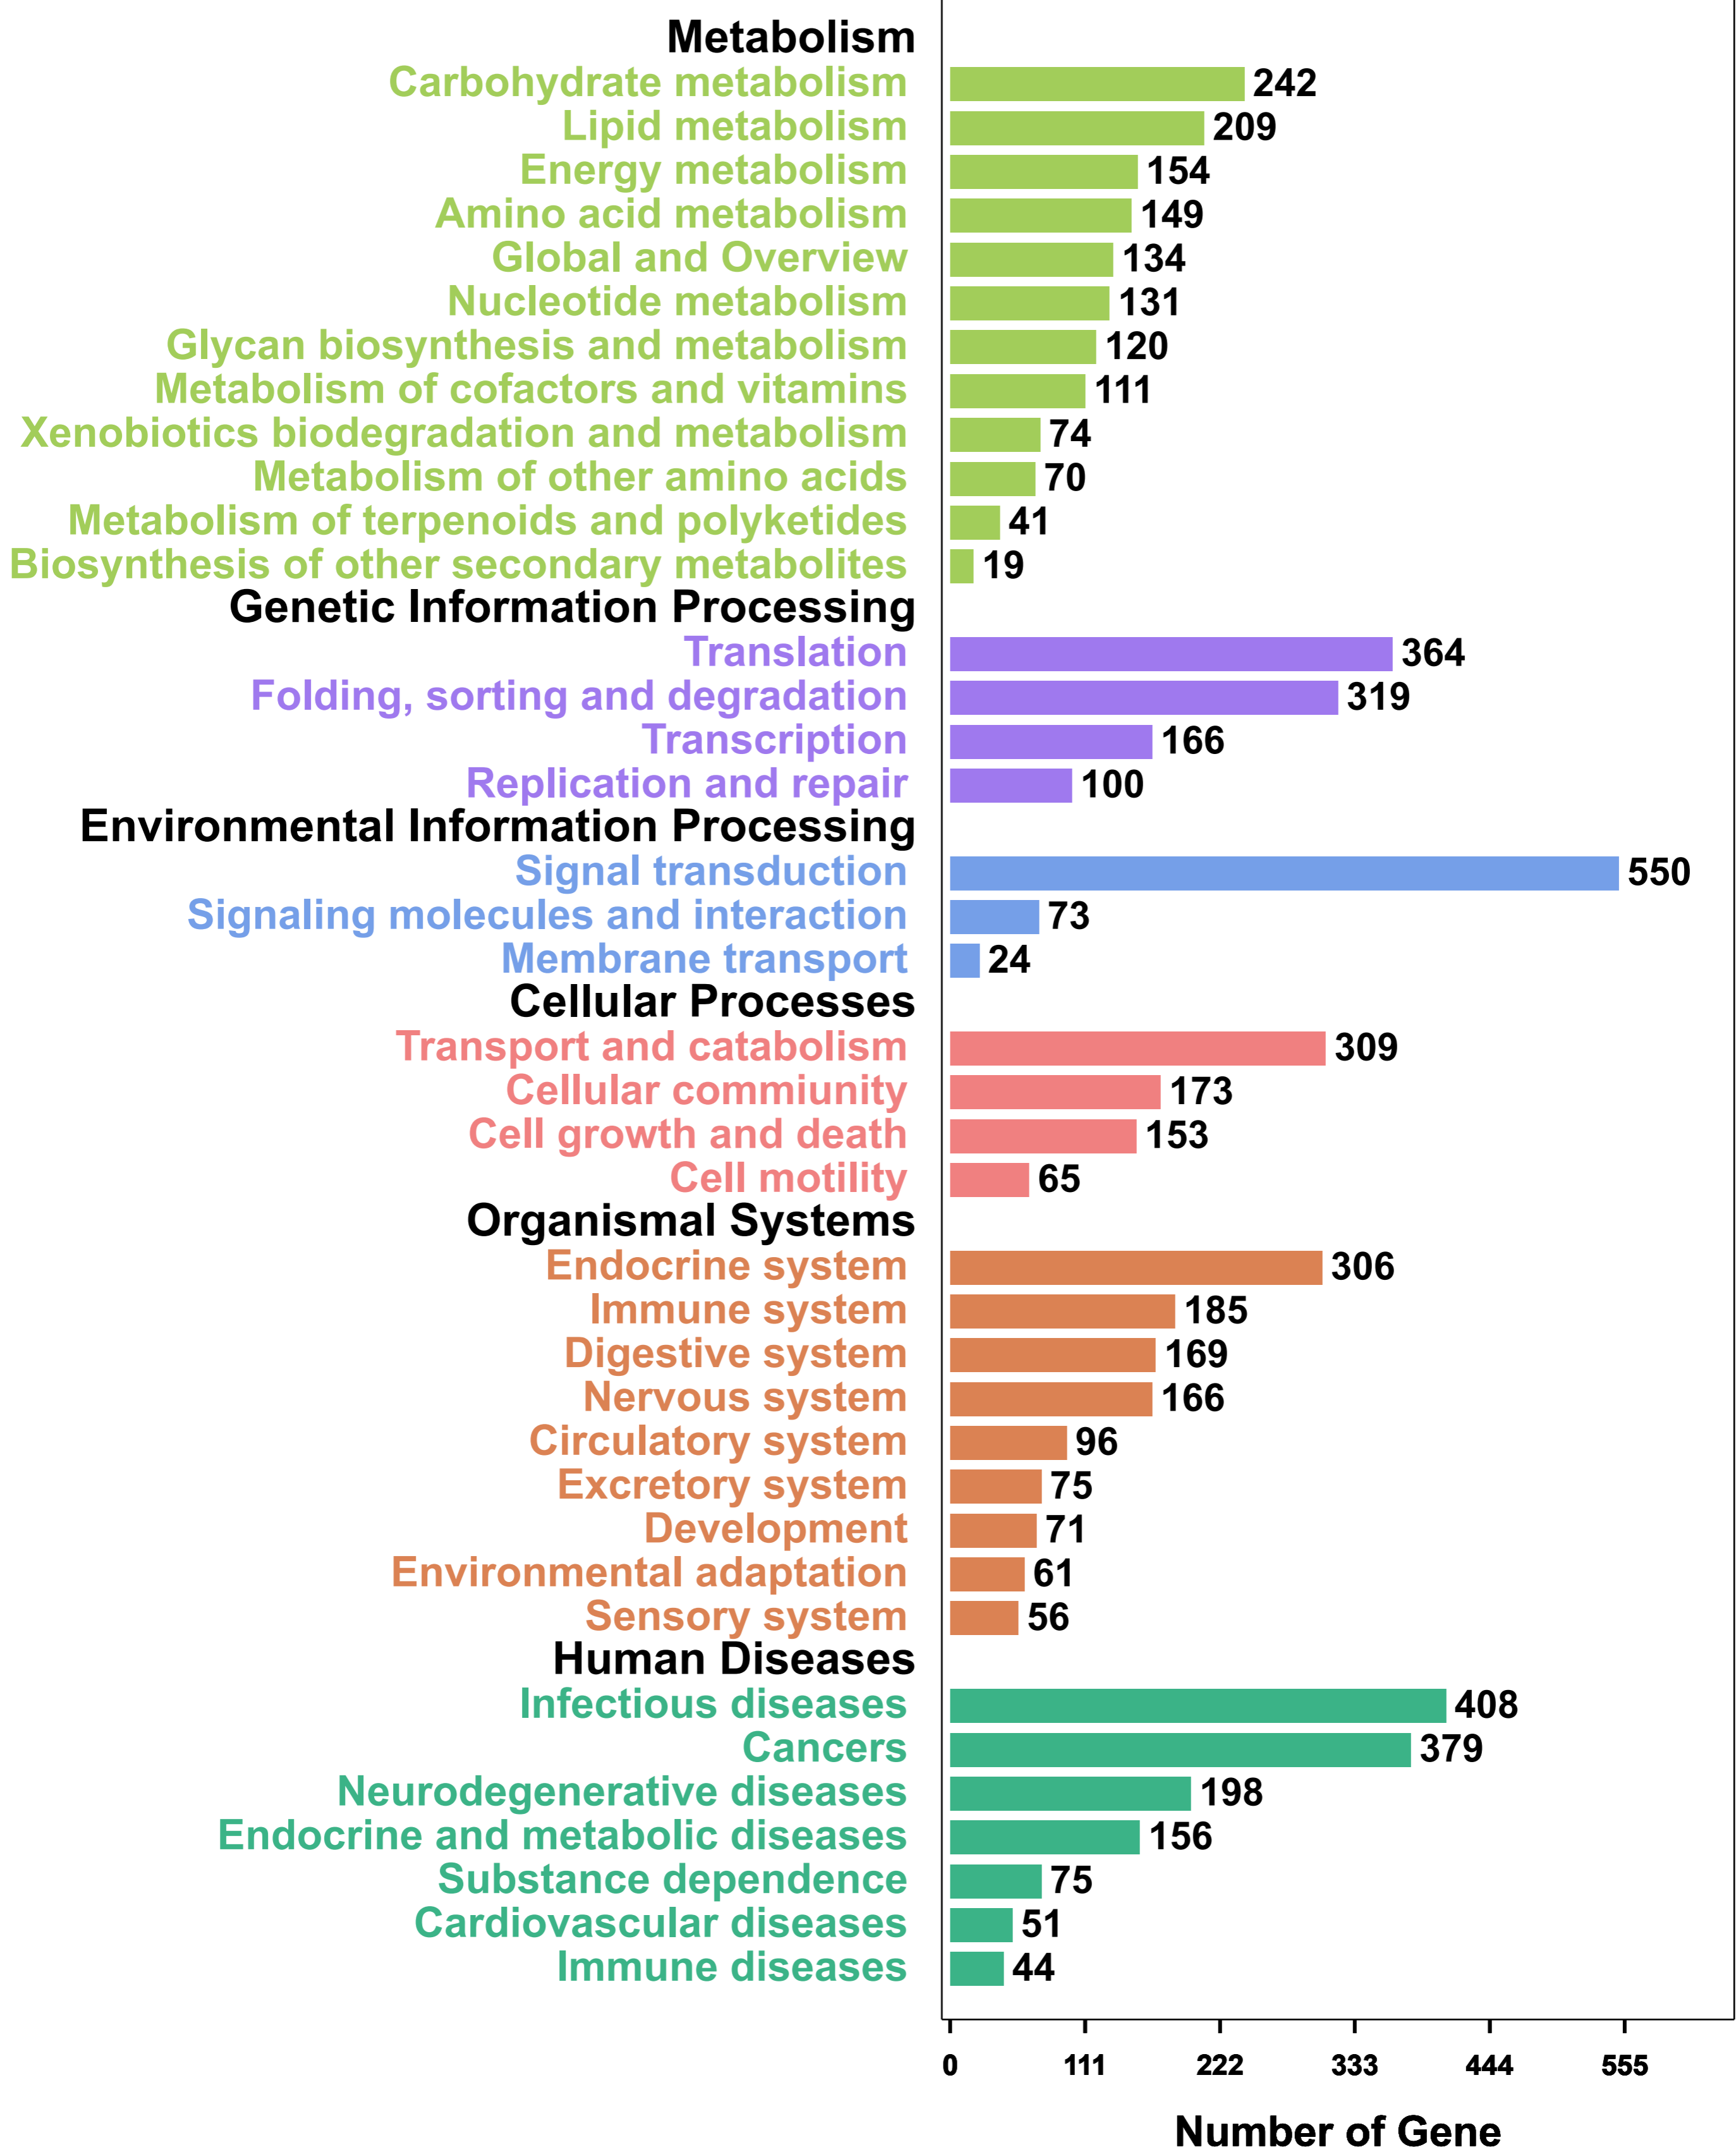

Supplement: 12864_2018_5172_MOESM6_ESM.pdf [file 12864_2018_5172_MOESM6_ESM.pdf]
